# Supplementary figures and images for: The cytokine GDF15 signals through a population of brainstem cholecystokinin neurons to mediate anorectic signalling
Source: eLife journal article supplement (doi:10.7554/elife.55164), 2020-07-29

A

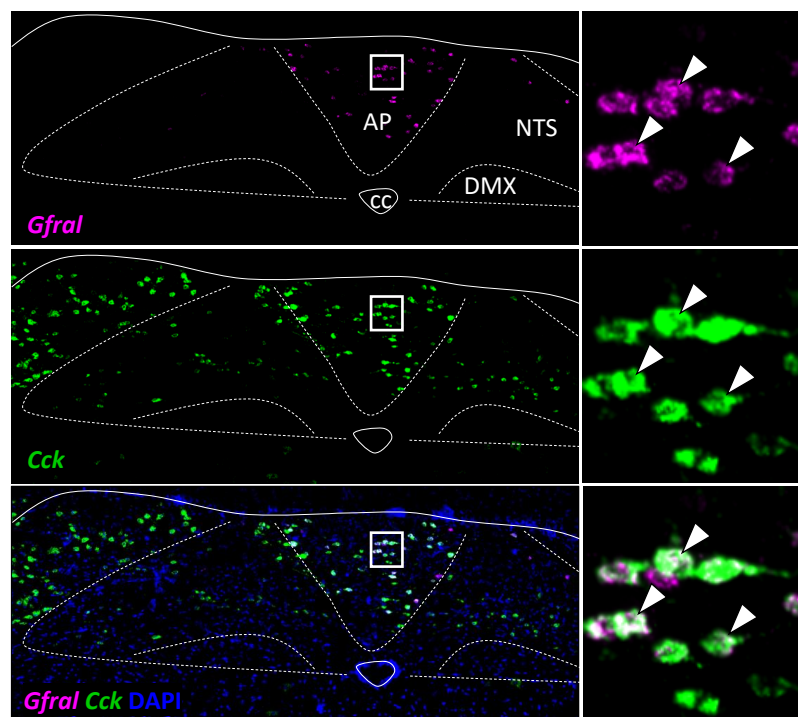

C

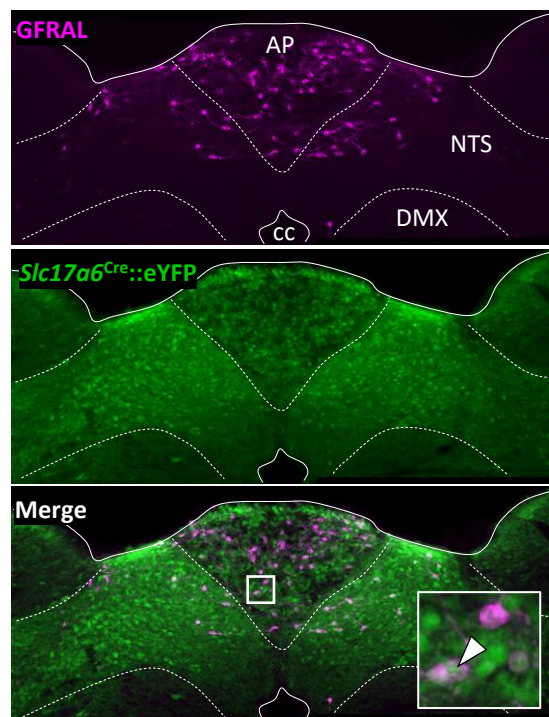

B

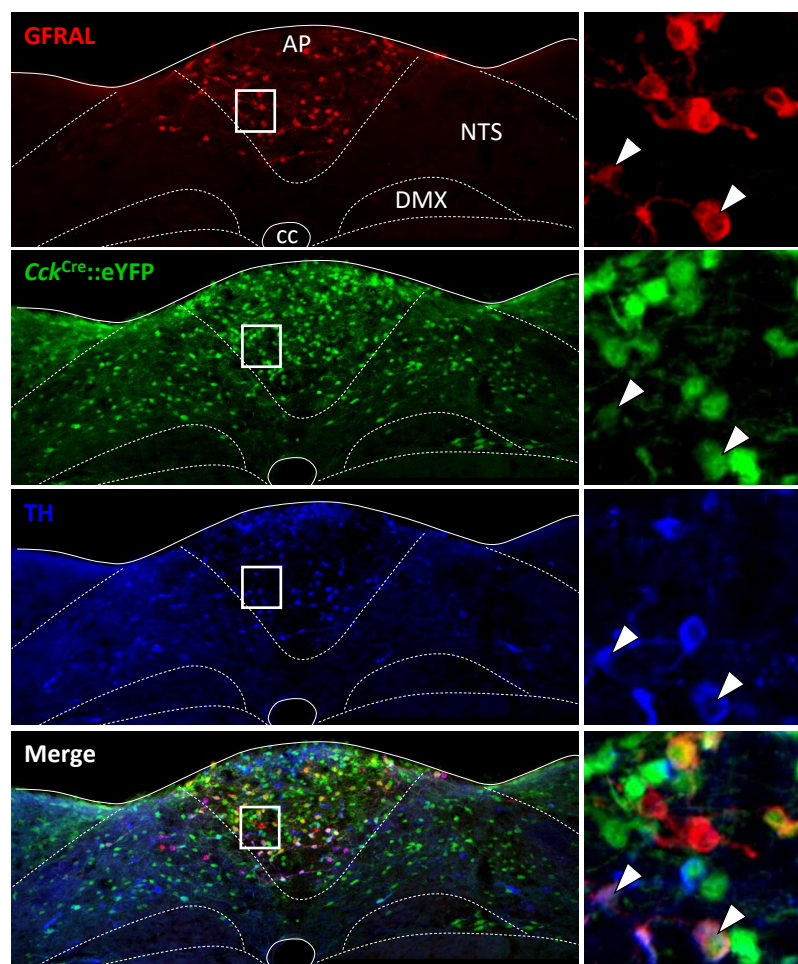

D

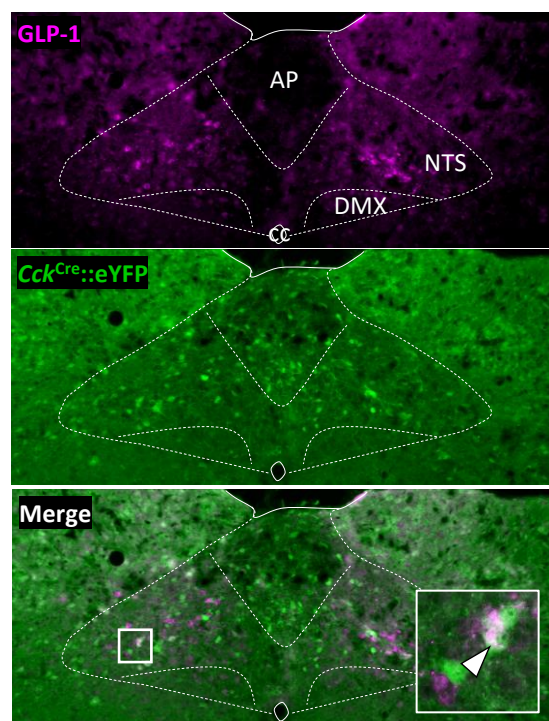

Supplement: supp [file elife_poa_e55164_Figure_1_figure_supplement_1.pdf › elife_poa_e55164_Figure_1_figure_supplement_1.pdf]

A

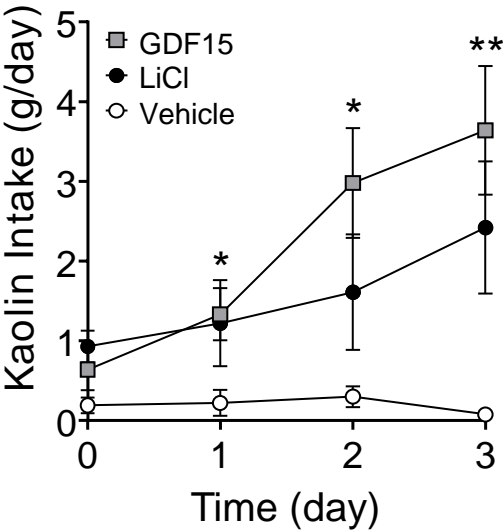

Supplement: supp [file elife_poa_e55164_Figure_2_figure_supplement_1.pdf › elife_poa_e55164_Figure_2_figure_supplement_1.pdf]

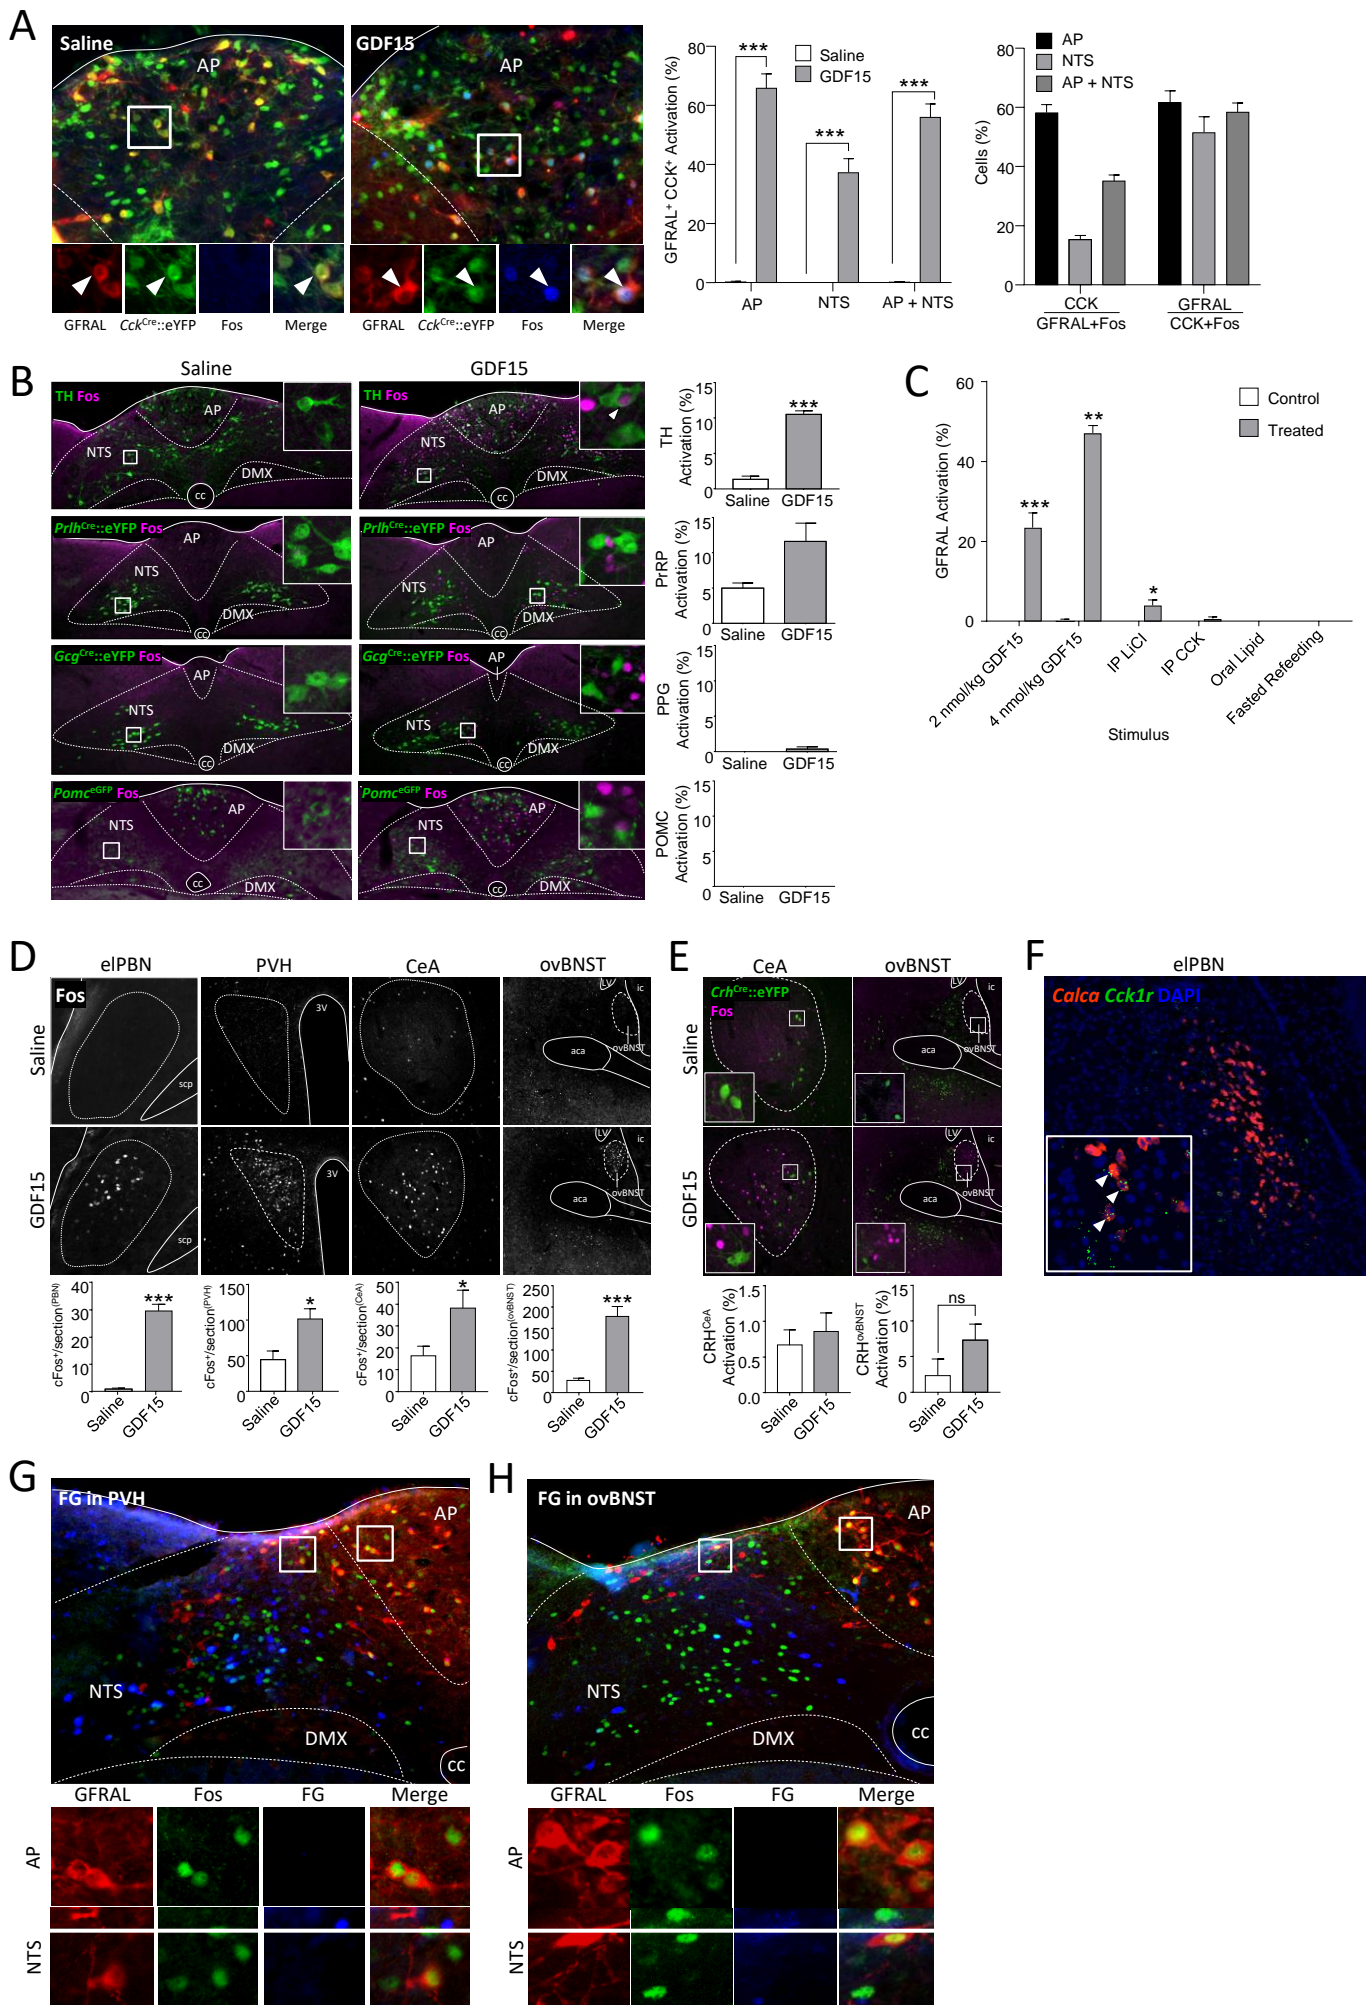

Supplement: supp [file elife_poa_e55164_Figure_3_figure_supplement_1.pdf › elife_poa_e55164_Figure_3_figure_supplement_1.pdf]

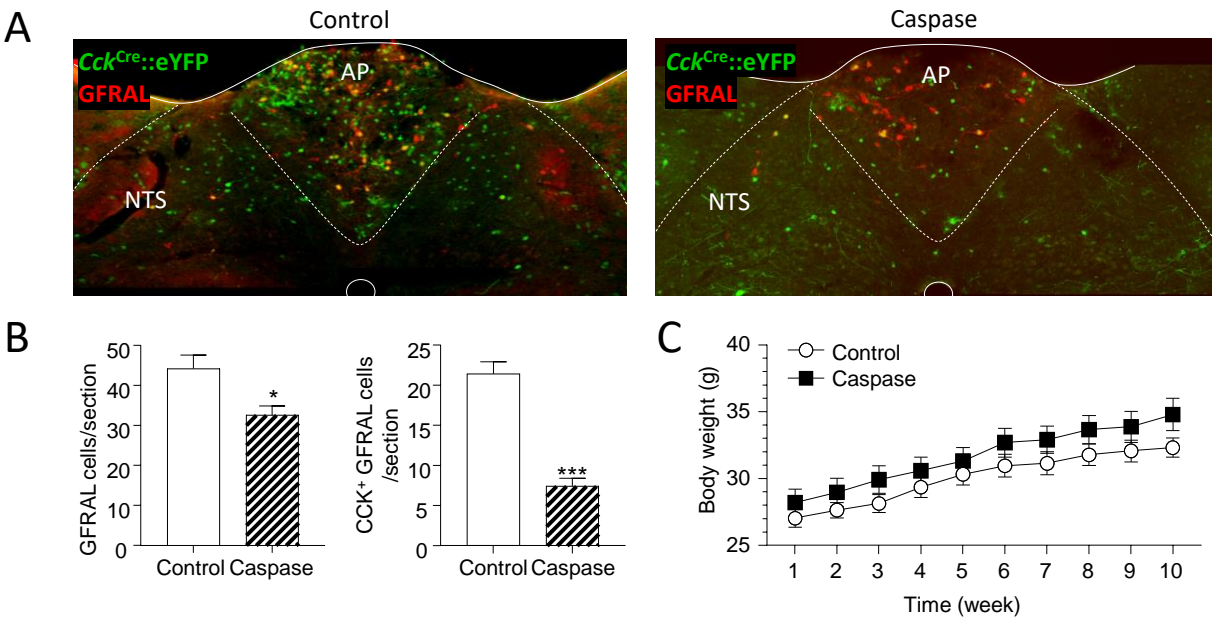

Supplement: supp [file elife_poa_e55164_Figure_4_figure_supplement_1.pdf › elife_poa_e55164_Figure_4_figure_supplement_1.pdf]

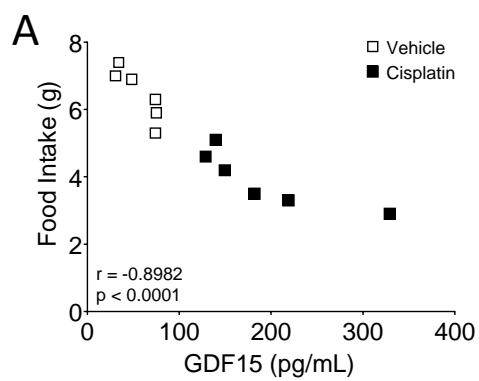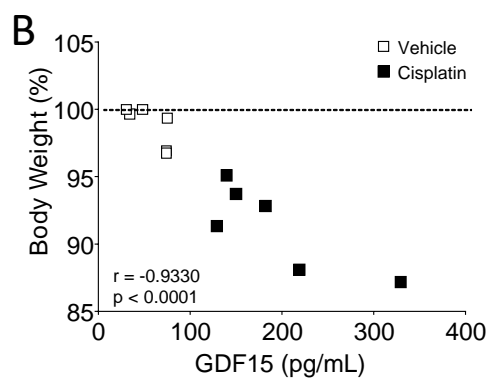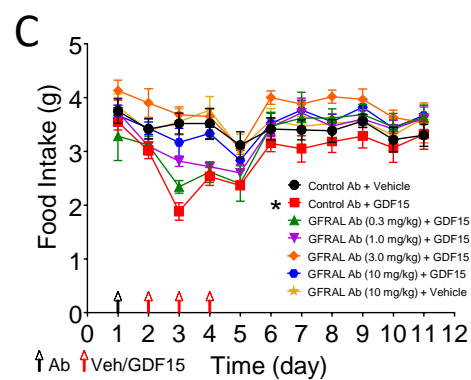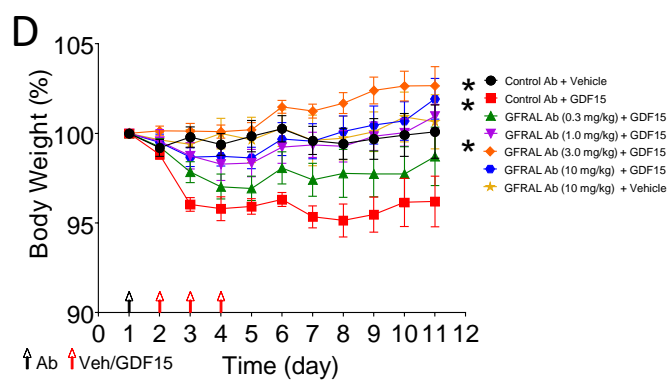

Supplement: supp [file elife_poa_e55164_Figure_5_figure_supplement_1.pdf › elife_poa_e55164_Figure_5_figure_supplement_1.pdf]
